# Supplementary material
Source: bioRxiv or medRxiv preprint supplement (https://www.biorxiv.org/highwire/filestream/92959/field_highwire_adjunct_files/3/302307-2.pdf)
Supplement: Supplementary file [file 302307-2.pdf]

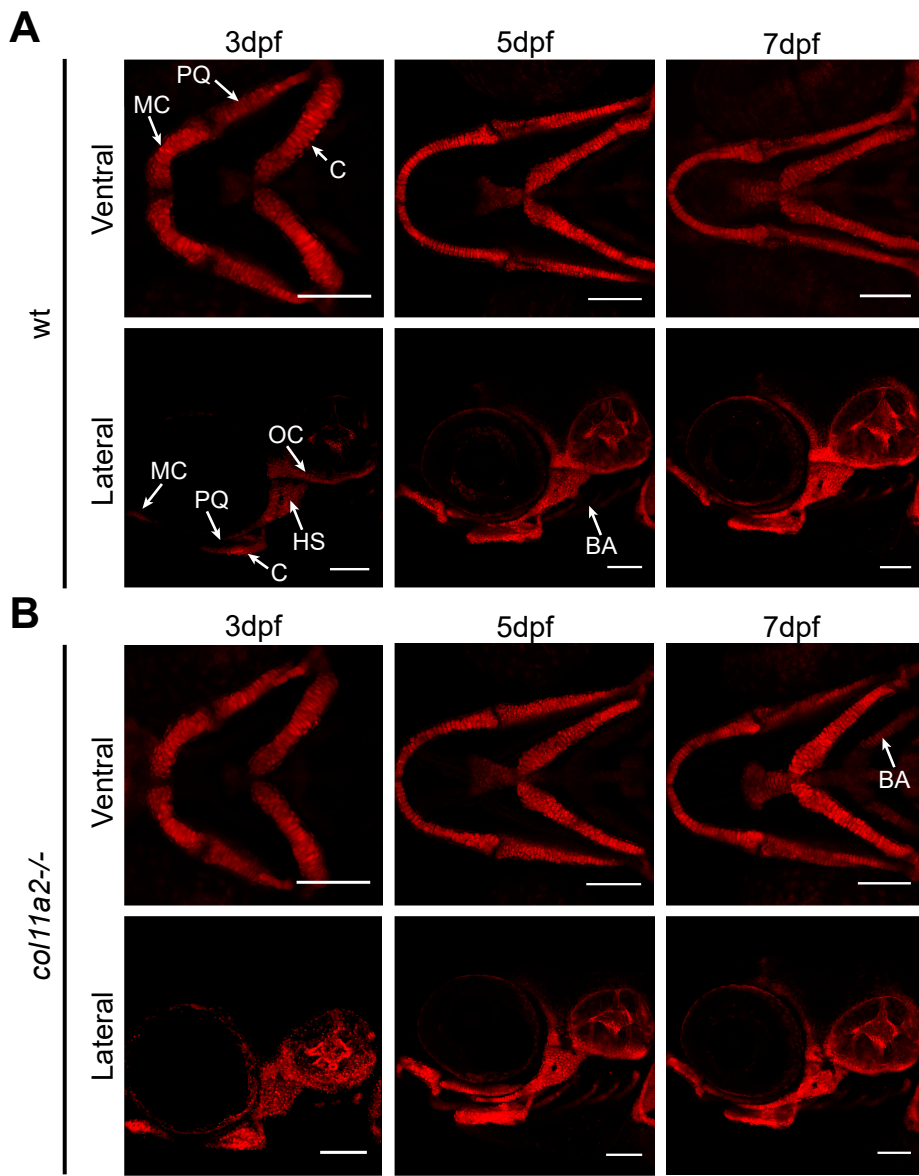

**Supplementary Figure 2: *col2a1* expression in craniofacial cartilages is unaffected by loss of *col11a2*.** Ventral and lateral views of wt (A) and *col11a2*<sup>-/-</sup> (B) zebrafish carrying *Tg(col2a1a:mCherry)*. MC = Meckel's cartilage, PQ = palatoquadrate, C = ceratohyal, HS = hyosymplectic, OC = otic capsule and BA = branchial arches. Scale bar = 100µm.
